# Supplementary material for: A series of coordination polymers with tuned terphenyl tetracarboxylates and bis-pyridyl ligands with different flexibilities manifesting fluorescence properties and photocatalytic activities
Source: Royal Society of Chemistry journal article supplement (doi:10.1039/c5ce02174j), 2015-12-28
Supplement: c5ce02174j1.pdf [file c5ce02174j1.pdf]

Supplementary Material (ESI) for CrystEngComm  
This journal is © The Royal Society of Chemistry

**A series of coordination polymers tuned terphenyl tetracarboxylates and bipyridyl ligands with different flexibilities manifesting fluorescence properties and photocatalytic activities**

**Bao Mu, Ru-Dan Huang\***

*Key Laboratory of Cluster Science of Ministry of Education, School of Chemistry,  
Beijing Institute of Technology, Beijing, 100081, P. R. China*

**ELECTRONIC SUPPLEMENTARY INFORMATION**

**Table S1.** Selected bond distances (Å) and angles (deg) for complex **1**.

|                     |           |                     |           |
|---------------------|-----------|---------------------|-----------|
| Co(1)–O(5)#1        | 2.054(3)  | Co(2)–O(2)          | 2.082(3)  |
| Co(1)–O(5)          | 2.054(3)  | Co(2)–O(2)#2        | 2.082(3)  |
| Co(1)–O(1)          | 2.063(3)  | Co(2)–O(6)#2        | 2.099(3)  |
| Co(1)–O(1)#1        | 2.063(3)  | Co(2)–O(6)          | 2.099(3)  |
| Co(1)–N(1)#1        | 2.190(3)  | Co(2)–N(3)#2        | 2.157(4)  |
| Co(1)–N(1)          | 2.190(3)  | Co(2)–N(3)          | 2.157(4)  |
| O(5)#1–Co(1)–O(5)   | 180.00    | O(2)–Co(2)–O(2)#2   | 180.00    |
| O(5)#1–Co(1)–O(1)   | 90.32(11) | O(2)–Co(2)–O(6)#2   | 85.03(10) |
| O(5)–Co(1)–O(1)     | 89.68(10) | O(2)#2–Co(2)–O(6)#2 | 94.97(10) |
| O(5)#1–Co(1)–O(1)#1 | 89.68(10) | O(2)–Co(2)–O(6)     | 94.97(10) |
| O(5)–Co(1)–O(1)#1   | 90.32(10) | O(2)#2–Co(2)–O(6)   | 85.03(10) |
| O(1)–Co(1)–O(1)#1   | 180.00    | O(6)#2–Co(2)–O(6)   | 180.00    |
| O(5)#1–Co(1)–N(1)#1 | 91.91(12) | O(2)–Co(2)–N(3)#2   | 92.44(12) |
| O(5)–Co(1)–N(1)#1   | 88.09(12) | O(2)#2–Co(2)–N(3)#2 | 87.56(12) |
| O(1)–Co(1)–N(1)#1   | 88.55(12) | O(6)#2–Co(2)–N(3)#2 | 87.44(12) |
| O(1)#1–Co(1)–N(1)#1 | 91.45(12) | O(6)–Co(2)–N(3)#2   | 92.56(12) |
| O(5)#1–Co(1)–N(1)   | 88.09(12) | O(2)–Co(2)–N(3)     | 87.56(12) |
| O(5)–Co(1)–N(1)     | 91.91(12) | O(2)#2–Co(2)–N(3)   | 92.44(12) |
| O(1)–Co(1)–N(1)     | 91.45(12) | O(6)#2–Co(2)–N(3)   | 92.56(12) |
| O(1)#1–Co(1)–N(1)   | 88.55(12) | O(6)–Co(2)–N(3)     | 87.44(12) |

\* Corresponding author. *E-mail address:* [huangrd@bit.edu.cn](mailto:huangrd@bit.edu.cn) (R. D. Huang).

---

|                                                           |        |                   |        |
|-----------------------------------------------------------|--------|-------------------|--------|
| N(1)#1–Co(1)–N(1)                                         | 180.00 | N(3)#2–Co(2)–N(3) | 180.00 |
| Symmetry code for #1 $-x, -y+1, -z$ ; #2 $-x+1, -y+1, -z$ |        |                   |        |

---

**Table S2.** Selected bond distances (Å) and angles (deg) for complex **2**.

---

|                                                                                                   |            |                     |            |
|---------------------------------------------------------------------------------------------------|------------|---------------------|------------|
| Co(1)–O(1)                                                                                        | 1.985(2)   | Co(2)–O(2)          | 2.030(2)   |
| Co(1)–N(1)                                                                                        | 2.058(4)   | Co(2)–O(3)          | 2.033(3)   |
| Co(1)–O(5)#1                                                                                      | 2.000(2)   | Co(2)–O(4)#1        | 2.002(2)   |
| Co(1)–O(6)#4                                                                                      | 2.136(3)   | Co(2)–N(4)#2        | 2.100(3)   |
| Co(1)–O(7)#4                                                                                      | 2.200(3)   | Co(2)–O(8)#3        | 2.206(3)   |
| O(1)–Co(1)–N(1)                                                                                   | 94.20(13)  | O(5)#1–Co(1)–O(7)#4 | 91.30(12)  |
| O(1)–Co(1)–O(5)#1                                                                                 | 150.53(12) | O(4)#1–Co(2)–O(8)#3 | 86.50(12)  |
| O(1)–Co(1)–O(6)#4                                                                                 | 86.26(12)  | O(2)–Co(2)–O(3)     | 101.43(13) |
| O(1)–Co(1)–O(7)#4                                                                                 | 109.98(12) | O(2)–Co(2)–O(4)#1   | 151.02(12) |
| O(6)#4–Co(1)–O(7)#4                                                                               | 60.35(11)  | O(2)–Co(2)–N(4)#2   | 96.43(13)  |
| O(5)#1–Co(1)–N(1)                                                                                 | 98.64(13)  | O(2)–Co(2)–O(8)#3   | 81.45(12)  |
| O(6)#4–Co(1)–N(1)                                                                                 | 166.86(13) | O(3)–Co(2)–O(4)#1   | 104.48(13) |
| O(7)#4–Co(1)–N(1)                                                                                 | 107.46(13) | O(3)–Co(2)–N(4)#2   | 90.75(14)  |
| O(8)#3–Co(2)–N(4)#2                                                                               | 177.50(13) | O(3)–Co(2)–O(8)#3   | 88.39(12)  |
| O(5)#1–Co(1)–O(6)#4                                                                               | 87.07(12)  | O(4)#1–Co(2)–N(4)#2 | 95.99(13)  |
| Symmetry code for #1 $x, 1+y, z$ ; #2 $1+x, 1+y, 1+z$ ; #3 $1-x, -y, 1-z$ ;<br>#4 $1-x, 1-y, 2-z$ |            |                     |            |

---

**Table S3.** Selected bond distances (Å) and angles (deg) for complex **3**.

---

|                     |           |                     |           |
|---------------------|-----------|---------------------|-----------|
| Co(1)–O(1)#1        | 2.095(2)  | Co(1)–O(6)#1        | 2.097(2)  |
| Co(1)–O(1)          | 2.095(2)  | Co(1)–N(1)          | 2.159(3)  |
| Co(1)–O(6)          | 2.097(2)  | Co(1)–N(1)#1        | 2.159(3)  |
| O(1)#1–Co(1)–O(1)   | 180.00    | O(6)–Co(1)–N(1)     | 88.25(10) |
| O(1)#1–Co(1)–O(6)   | 88.03(9)  | O(6)#1–Co(1)–N(1)   | 91.75(10) |
| O(1)–Co(1)–O(6)     | 91.97(9)  | O(1)#1–Co(1)–N(1)#1 | 88.64(10) |
| O(1)#1–Co(1)–O(6)#1 | 91.97(9)  | O(1)–Co(1)–N(1)#1   | 91.36(10) |
| O(1)–Co(1)–O(6)#1   | 88.03(9)  | O(6)–Co(1)–N(1)#1   | 91.75(10) |
| O(6)–Co(1)–O(6)#1   | 180.00    | O(6)#1–Co(1)–N(1)#1 | 88.25(10) |
| O(1)#1–Co(1)–N(1)   | 91.36(10) | N(1)–Co(1)–N(1)#1   | 180.00    |
| O(1)–Co(1)–N(1)     | 88.64(10) |                     |           |

---

Symmetry code for #1  $-x+1, -y+1, -z+1$

**Table S4.** Selected bond distances (Å) and angles (deg) for complex 4.

|                     |            |                     |          |
|---------------------|------------|---------------------|----------|
| Ni(1)–O(1)          | 2.0623(19) | Ni(1)–O(5)#1        | 2.086(2) |
| Ni(1)–O(1)#1        | 2.0623(19) | Ni(1)–N(1)          | 2.122(3) |
| Ni(1)–O(5)          | 2.086(2)   | Ni(1)–N(1)#1        | 2.122(3) |
| O(1)–Ni(1)–O(1)#1   | 180.00     | O(5)–Ni(1)–N(1)     | 88.66(9) |
| O(1)–Ni(1)–O(5)     | 90.98(8)   | O(5)#1–Ni(1)–N(1)   | 91.34(9) |
| O(1)#1–Ni(1)–O(5)   | 89.02(8)   | O(1)–Ni(1)–N(1)#1   | 91.87(9) |
| O(1)–Ni(1)–O(5)#1   | 89.02 (8)  | O(1)#1–Ni(1)–N(1)#1 | 88.13(9) |
| O(1)#1–Ni(1)–O(5)#1 | 90.98 (8)  | O(5)–Ni(1)–N(1)#1   | 91.34(9) |
| O(5)–Ni(1)–O(5)#1   | 180.00     | O(5)#1–Ni(1)–N(1)#1 | 88.66(9) |
| O(1)–Ni(1)–N(1)     | 88.13(9)   | N(1)–Ni(1)–N(1)#1   | 180.00   |
| O(1)#1–Ni(1)–N(1)   | 91.87(9)   |                     |          |

Symmetry code for #1  $-x+1, -y+1, -z+1$

**Table S5.** Selected bond distances (Å) and angles (deg) for complex 5.

|                     |          |                   |           |
|---------------------|----------|-------------------|-----------|
| Ni(1)–O(4)#1        | 2.023(6) | Ni(1)–O(1)#3      | 2.103(6)  |
| Ni(1)–O(3)#2        | 2.025(6) | Ni(1)–O(2)        | 2.117(5)  |
| Ni(1)–N(1)          | 2.034(7) | Ni(1)–O(1)        | 2.143(5)  |
| O(4)#1–Ni(1)–O(3)#2 | 165.5(2) | N(1)–Ni(1)–O(2)   | 108.6(2)  |
| O(4)#1–Ni(1)–N(1)   | 96.4(3)  | O(1)#3–Ni(1)–O(2) | 158.9(2)  |
| O(3)#2–Ni(1)–N(1)   | 93.9(3)  | O(4)#1–Ni(1)–O(1) | 85.6(2)   |
| O(4)#1–Ni(1)–O(1)#3 | 83.9(2)  | O(3)#2–Ni(1)–O(1) | 86.0(2)   |
| O(3)#2–Ni(1)–O(1)#3 | 85.7(2)  | N(1)–Ni(1)–O(1)   | 170.4(3)  |
| N(1)–Ni(1)–O(1)#3   | 91.6(2)  | O(1)#3–Ni(1)–O(1) | 97.99(19) |
| O(4)#1–Ni(1)–O(2)   | 87.6(2)  | O(2)–Ni(1)–O(1)   | 62.0(2)   |
| O(3)#2–Ni(1)–O(2)   | 98.8(2)  |                   |           |

Symmetry code for #1  $x-1, y, z$ ; #2  $-x+3, -y+1, -z+1$ ; #3  $-x+2, -y+1, -$

**Table S6.** Selected bond distances (Å) and angles (deg) for complex 6.

|            |          |             |          |
|------------|----------|-------------|----------|
| Cd(1)–O(1) | 2.427(8) | Cd(1)–O(9)  | 2.325(8) |
| Cd(1)–O(2) | 2.350(7) | Cd(1)–O(10) | 2.317(9) |
| Cd(1)–O(3) | 2.411(8) | Cd(1)–N(1)  | 2.398(7) |

|                  |          |                  |          |
|------------------|----------|------------------|----------|
| Cd(1)–O(4)       | 2.361(7) | O(1)–Cd(1)–O(2)  | 54.5(3)  |
| O(1)–Cd(1)–O(3)  | 85.7(3)  | O(3)–Cd(1)–O(4)  | 54.1(2)  |
| O(1)–Cd(1)–O(4)  | 139.3(2) | O(3)–Cd(1)–O(9)  | 87.1(3)  |
| O(1)–Cd(1)–O(9)  | 95.1(3)  | O(3)–Cd(1)–O(10) | 94.4(3)  |
| O(1)–Cd(1)–O10   | 86.8(3)  | O(3)–Cd(1)–N(1)  | 136.7(3) |
| O(1)–Cd(1)–N(1)  | 137.6(3) | O(4)–Cd(1)–O(9)  | 89.5(3)  |
| O(2)–Cd(1)–O(3)  | 139.4(3) | O(4)–Cd(1)–O(10) | 89.9(3)  |
| O(2)–Cd(1)–O(4)  | 166.2(2) | O(4)–Cd(1)–N(1)  | 82.8(3)  |
| O(2)–Cd(1)–O(9)  | 88.9(3)  | O(9)–Cd(1)–O(10) | 177.7(3) |
| O(2)–Cd(1)–O(10) | 91.1(3)  | O(9)–Cd(1)–N(1)  | 88.3(3)  |
| O(2)–Cd(1)–N(1)  | 83.4(3)  | O(10)–Cd(1)–N(1) | 89.3(3)  |

**Table S7.** Selected bond distances (Å) and angles (deg) for complex 7.

|                     |           |                         |           |
|---------------------|-----------|-------------------------|-----------|
| Cd(1)–O(1)          | 2.198(10) | Cd(2)–O(2)              | 2.232(8)  |
| Cd(1)–O(3)          | 2.390(9)  | Cd(2)–N(1)#1            | 2.316(12) |
| Cd(1)–O(7)#2        | 2.203(12) | Cd(2)–O(4)#4            | 2.250(9)  |
| Cd(1)–O(4)#3        | 2.326(7)  | Cd(2)–O(8)#5            | 2.377(10) |
| Cd(1)–O(5)#3        | 2.486(9)  | Cd(2)–O(9)#5            | 2.373(9)  |
| Cd(1)–O(8)#5        | 2.243(8)  | Cd(2)–O(6)#6            | 2.259(10) |
| O(1)–Cd(1)–O(3)     | 171.4(3)  | O(5)#3–Cd(1)–<br>O(7)#2 | 98.2(3)   |
| O(1)–Cd(1)–O(7)#2   | 94.1(4)   | O(9)#3–Cd(2)–N(1)#1     | 167.5(3)  |
| O(1)–Cd(1)–O(4)#3   | 97.4(3)   | O(2)–Cd(2)–N(1)#1       | 93.1(4)   |
| O(1)–Cd(1)–O(5)#3   | 90.4(3)   | O(6)#6–Cd(2)–N(1)#1     | 87.9(4)   |
| O(4)#4–Cd(2)–O(8)#5 | 134.4(3)  | O(2)–Cd(2)–O(4)#4       | 104.2(3)  |
| O(1)–Cd(1)–O(8)#5   | 88.4(3)   | O(4)#4–Cd(2)–<br>O(2)   | 81.1(3)   |
| O(3)–Cd(1)–O(7)#2   | 91.7(4)   | O(2)–Cd(2)–O(8)#5       | 88.6(3)   |
| O(3)–Cd(1)–O(4)#3   | 87.0(3)   | O(4)#4–Cd(2)–<br>O(8)#5 | 87.2(3)   |
| O(3)–Cd(1)–O(5)#3   | 86.1(3)   | O(8)#5–Cd(2)–<br>O(6)#6 | 54.6(3)   |
| O(3)–Cd(1)–O(8)#5   | 84.3(3)   | O(6)#6–Cd(2)–<br>O(2)   | 83.1(4)   |
| O(4)#3–Cd(1)–O(7)#2 | 106.7(3)  | O(2)–Cd(2)–O(9)#5       | 91.1(3)   |
| O(5)#3–Cd(1)–O(7)#2 | 161.3(3)  | O(6)#6–Cd(2)–<br>O(2)   | 90.4(3)   |
| O(7)#2–Cd(1)–O(8)#5 | 100.1(3)  | O(2)–Cd(2)–O(6)#6       | 168.6(4)  |
| O(4)#3–Cd(1)–O(5)#3 | 54.6(3)   | O(4)#4–Cd(2)–N(1)#1     | 86.4(4)   |
| O(4)#3–Cd(1)–O(8)#5 | 152.1(3)  | O(8)#5–Cd(2)–N(1)#1     | 137.3(3)  |

Symmetry code for #1  $-1+x, y, z$ ; #2  $1+x, y, z$ ; #3  $-1-x, -1/2+y, -3/2-z$ ; #4  $-1-x, -y, -1-z$ ; #5  $-x, -y, -1-z$ ; #6  $1+x, -1/2-y, 1/2+z$

**Table S8.** Hydrogen-bonding geometry (Å, °) for complex 1.

| D-H...A                       | D-H  | H...A | D...A  | D-H...A |
|-------------------------------|------|-------|--------|---------|
| O(4)-H(4)...N(2) <sup>a</sup> | 0.82 | 1.82  | 2.6382 | 175     |
| O(8)-H(8)...N(4) <sup>b</sup> | 0.82 | 1.93  | 2.7427 | 169     |

Symmetry code for (a)  $1-x, 1-y, 1-z$  (b)  $-1+x, y, -1+z$

**Table S9.** Hydrogen-bonding geometry (Å, °) for complex 3.

| D-H...A                        | D-H  | H...A | D...A  | D-H...A |
|--------------------------------|------|-------|--------|---------|
| O(6)-H(6C)...O(2) <sup>a</sup> | 0.85 | 2.14  | 2.8565 | 142     |

Symmetry code for (a)  $1-x, 1-y, 1-z$

**Table S10.** Hydrogen-bonding geometry (Å, °) for complex 4.

| D-H...A                               | D-H  | H...A | D...A  | D-H...A |
|---------------------------------------|------|-------|--------|---------|
| O(3)-H(3)...O(6) <sup>a</sup> $-H(3)$ | 0.82 | 1.77  | 2.5775 | 166     |
| O(5)-H(5B)...O(4) <sup>b</sup>        | 0.85 | 2.02  | 2.8645 | 175     |
| O(6)-H(6A)...O(1)                     | 0.85 | 1.92  | 2.7637 | 171     |
| O(6)-H(6B)...O(4) <sup>c</sup>        | 0.85 | 2.02  | 2.8654 | 171     |

Symmetry code for (a)  $1+x, y, z$  (b)  $-1+x, y, 1+z$  (c)  $2-x, 1-y, -z$

**Table S11.** Hydrogen-bonding geometry (Å, °) for complex 6.

| D-H...A                          | D-H  | H...A | D...A  | D-H...A |
|----------------------------------|------|-------|--------|---------|
| O(10)-H(10A)...N(2) <sup>a</sup> | 0.85 | 2.14  | 2.9899 | 175     |
| O(10)-H(10B)...O(1) <sup>b</sup> | 0.85 | 1.82  | 2.6724 | 175     |

Symmetry code for (a)  $-1+x, y, z$  (b)  $-x, 1-y, 1-z$

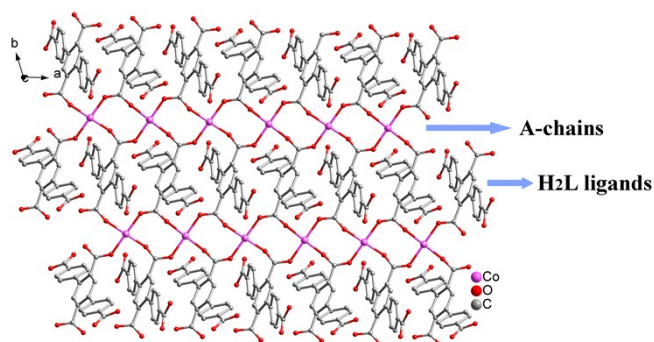

**Fig. S1.** The 2D coordination layer based on the Co-O A-chains and H<sub>2</sub>L ligands in **1**.

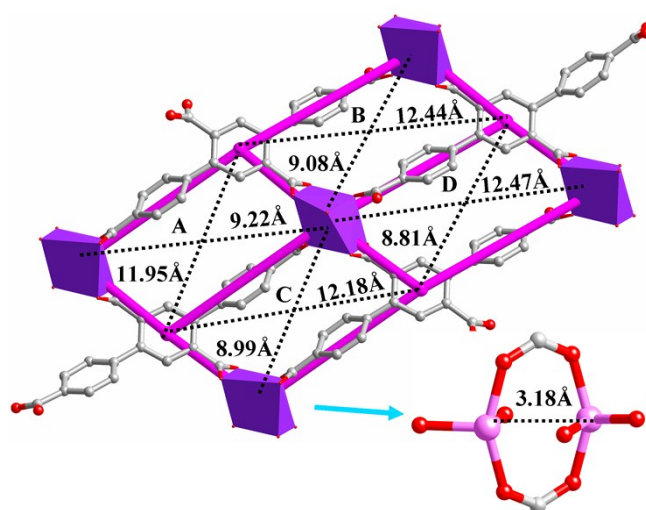

**Fig. S2.** The quadrilaterals with different sizes and the dinuclear Co<sup>II</sup> unit in complex **2**.

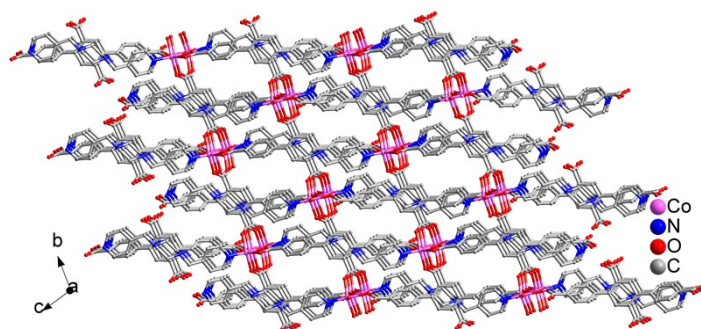

**Fig. S3.** The 3D framework of complex **2**.

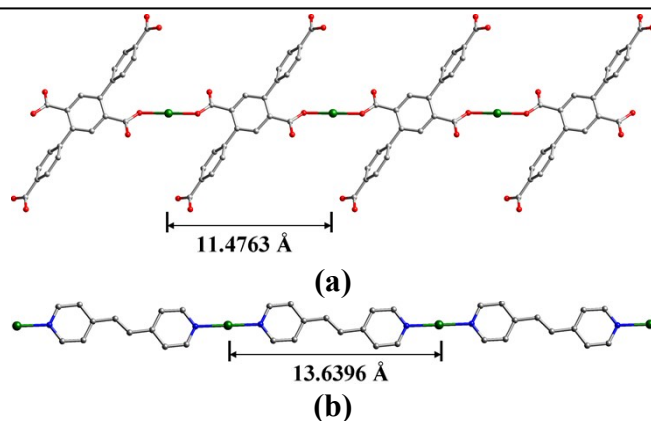

**Fig. S4.** (a) The “H”-type 1D Ni-H<sub>2</sub>L chain in complex 4. (b) The 1D straight chain based on Ni<sup>II</sup> ions and **bpe**.

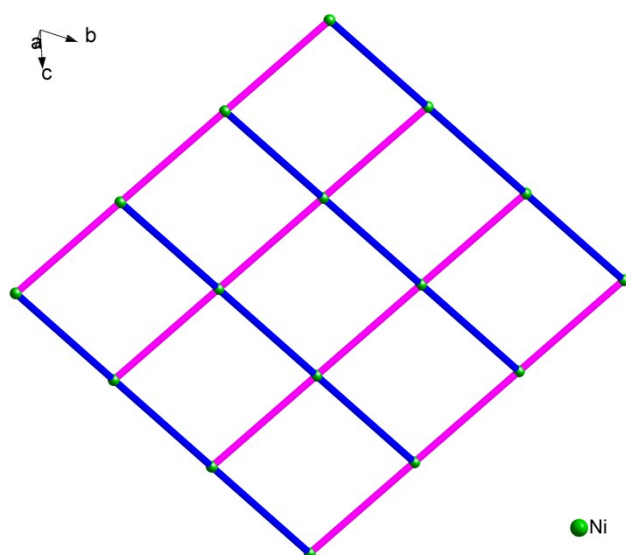

**Fig. S5.** The 4-connected 2D grid in 4.

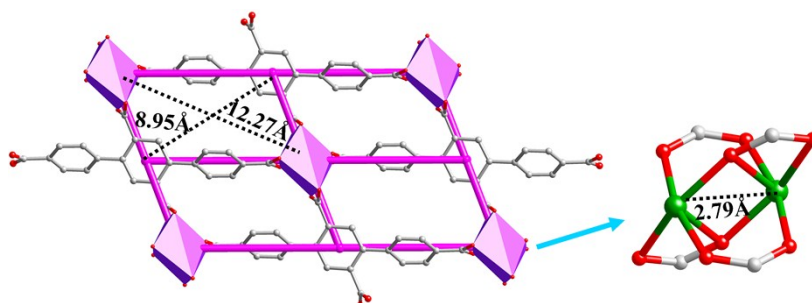

**Fig. S6.** The quadrilaterals with the same size and dinuclear Ni<sup>II</sup> unit in 5.

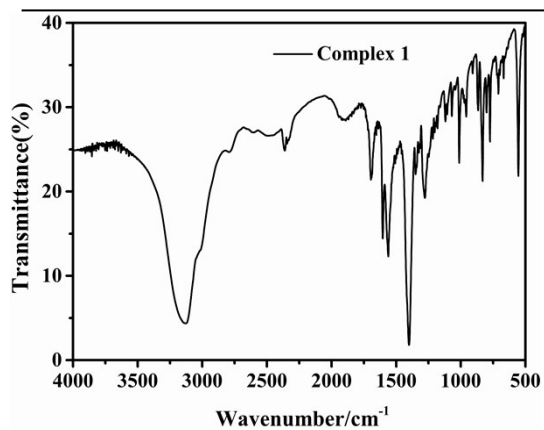

(a)

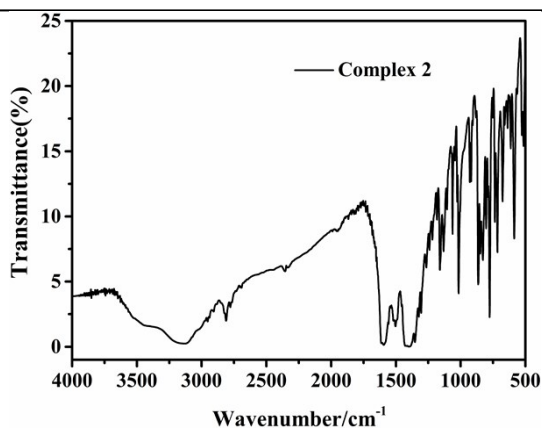

(b)

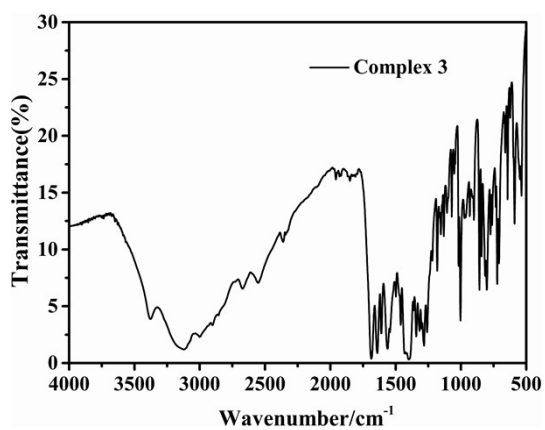

(c)

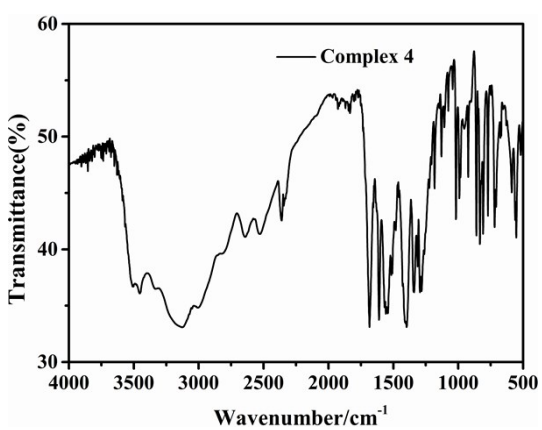

(d)

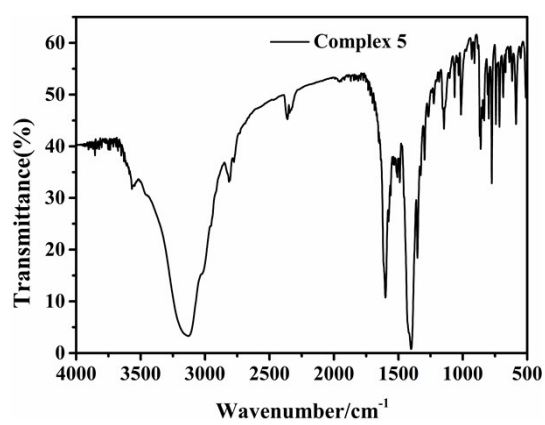

(e)

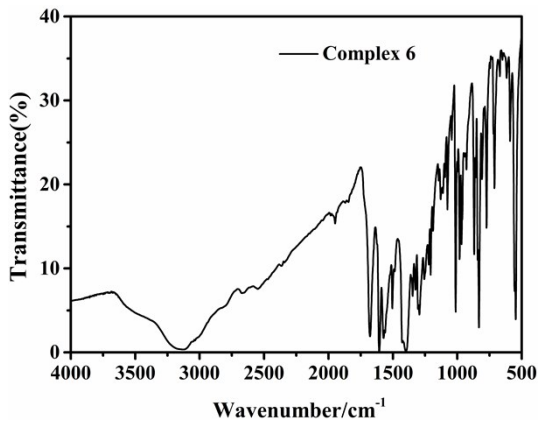

(f)



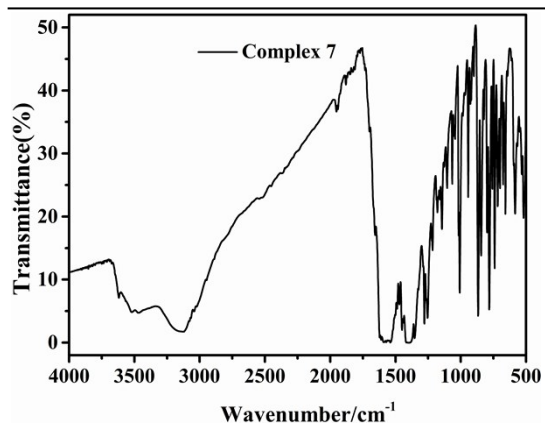

(g)

Fig. S7. The IR spectra of complexes 1–7.

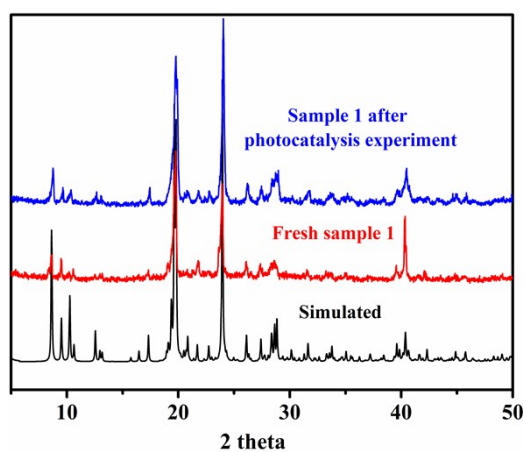

(a)

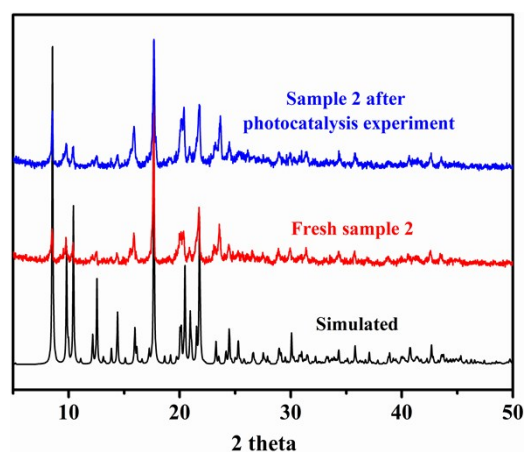

(b)

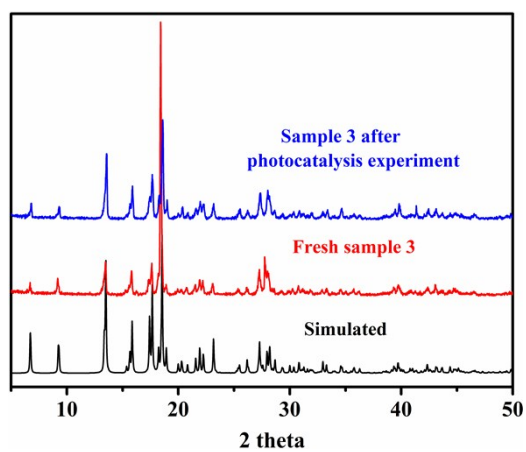

(c)

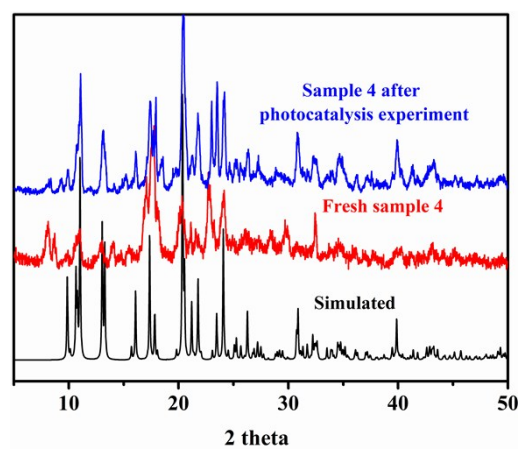

(d)

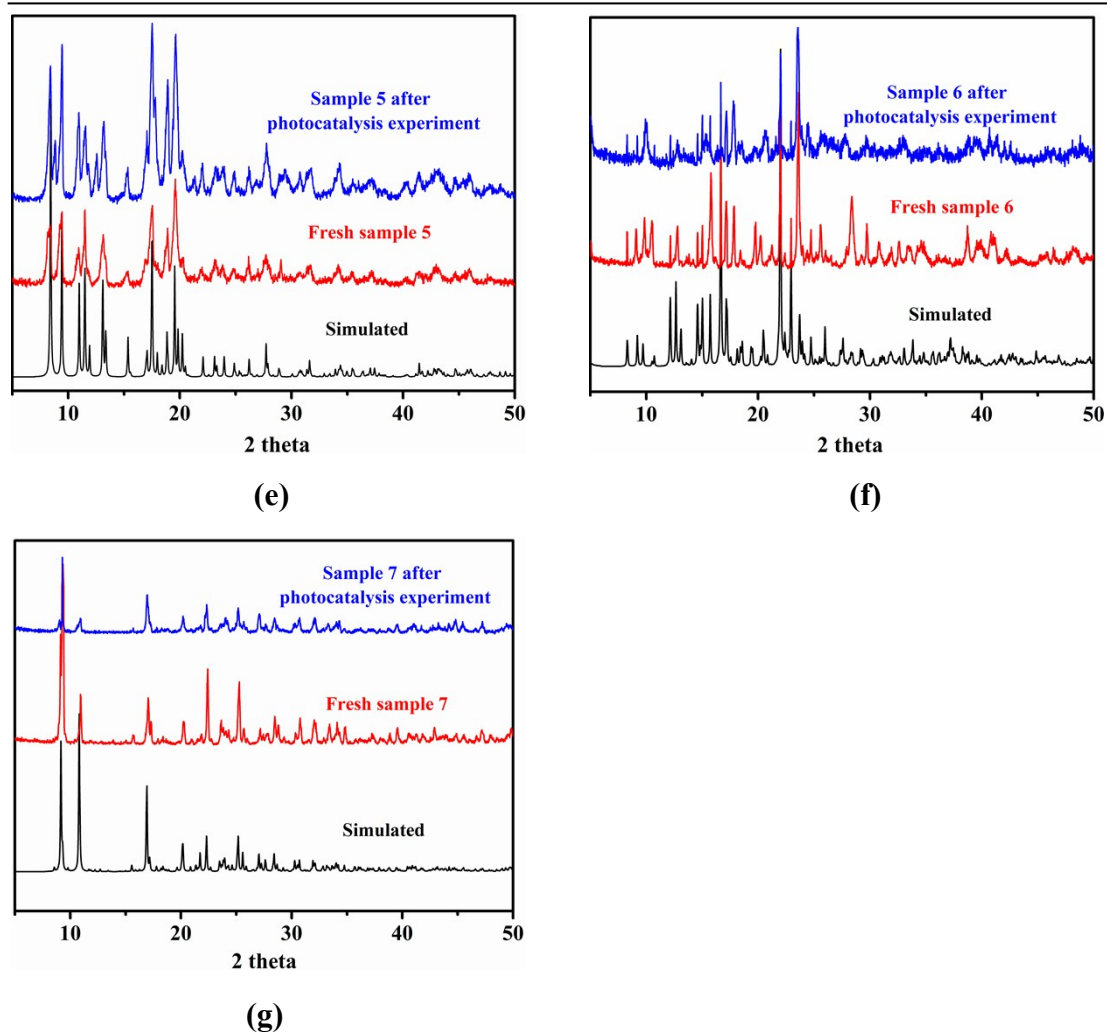

**Fig. S8.** The simulated (black line), fresh samples (red line) and samples after photocatalytic experiments (MB) (blue line) powder X-ray diffraction patterns for complexes 1–7.

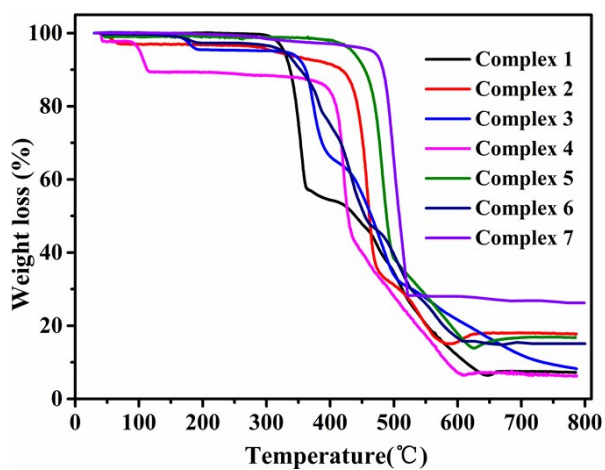

**Fig. S9.** The TG curves of complexes 1–7.

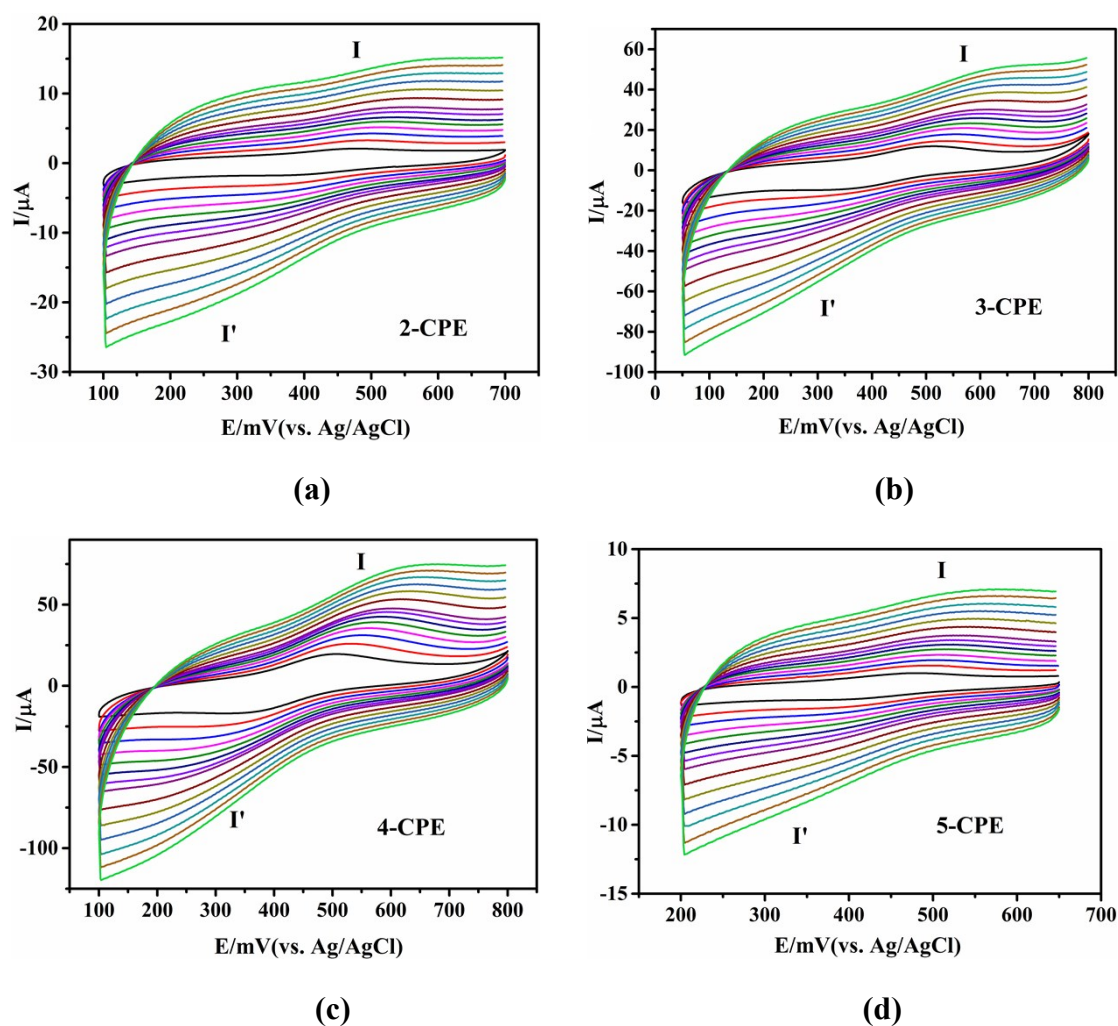

**Fig. S10.** Cyclic voltammograms of the 2-, 3-, 4-, 5-CPE in 0.01 M  $\text{H}_2\text{SO}_4$  + 0.5 M  $\text{Na}_2\text{SO}_4$  aqueous solution at different scan rates (from inner to outer: 25, 50, 75, 100, 125, 150, 175, 200, 250, 300, 350, 400, 450, 500  $\text{mV}\cdot\text{s}^{-1}$ ).

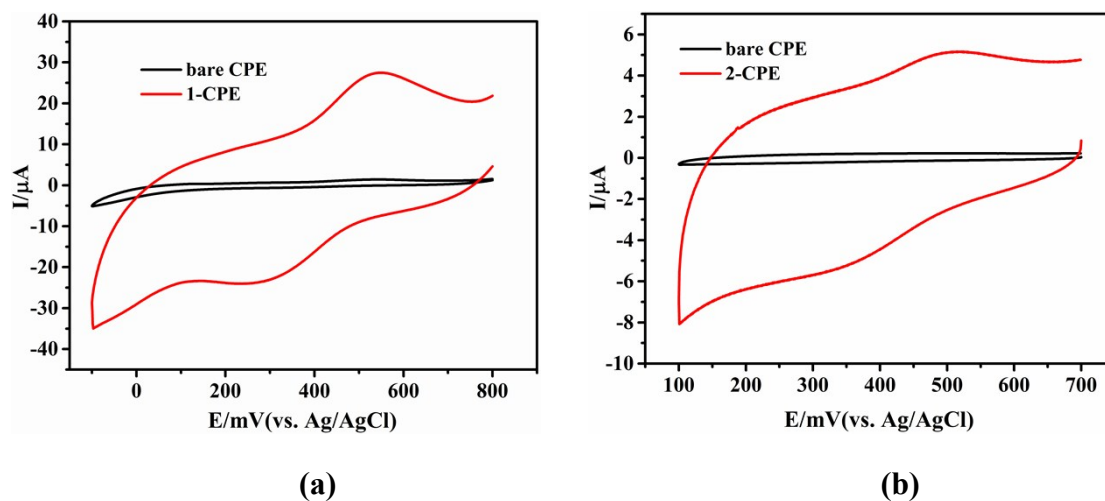

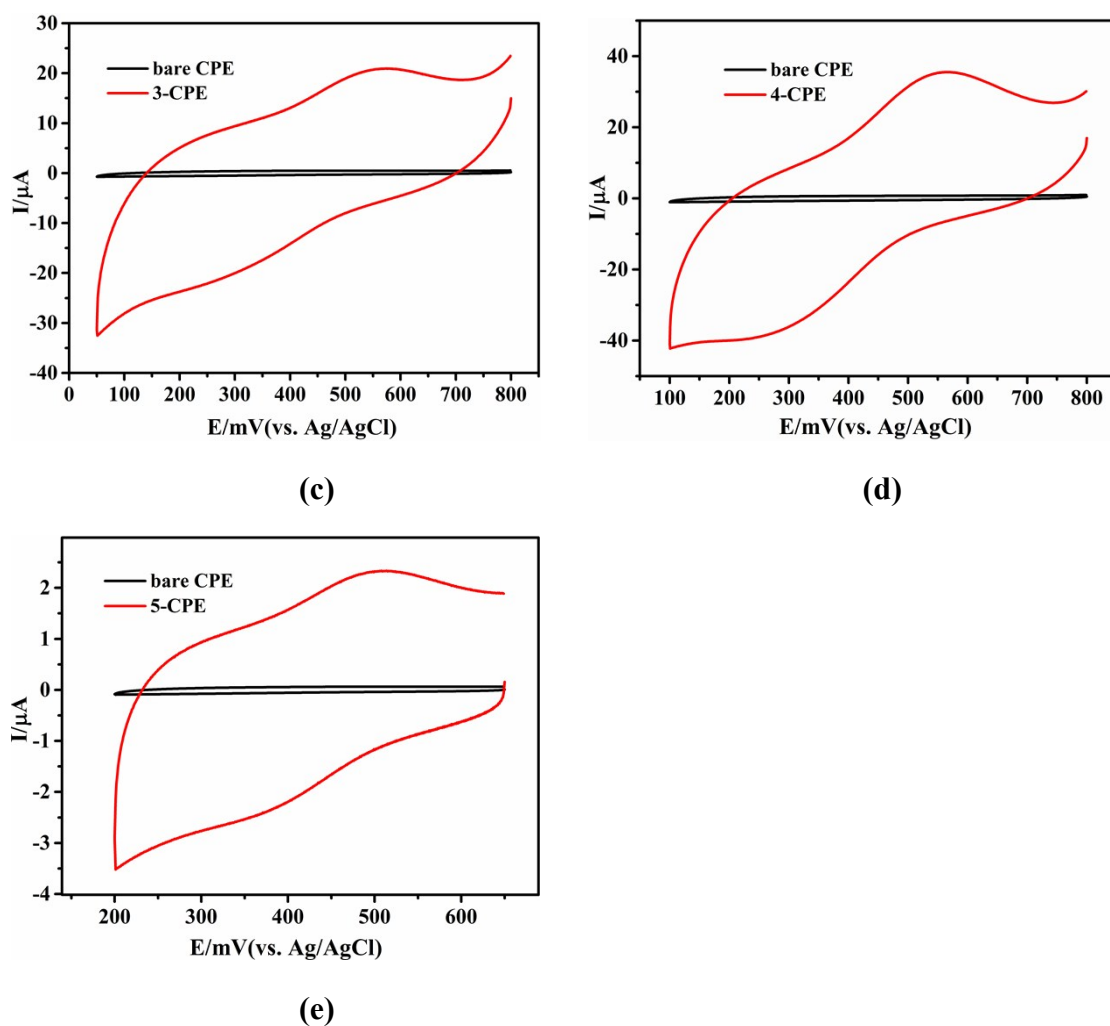

**Fig. S11.** Cyclic voltammogram of 1-, 2-, 3-, 4-, 5-CPE (-100 to 900 mV for 1-CPE, 100 to 700 mV for 2-CPE, 50 to 800 mV for 3-CPE, 100 to 800 mV for 4-CPE and 200 to 650 mV for 5-CPE) in 0.01 M  $\text{H}_2\text{SO}_4$  + 0.5 M  $\text{Na}_2\text{SO}_4$  aqueous solution for complexes 1-5. Scan rate:  $100 \text{ mVs}^{-1}$ .

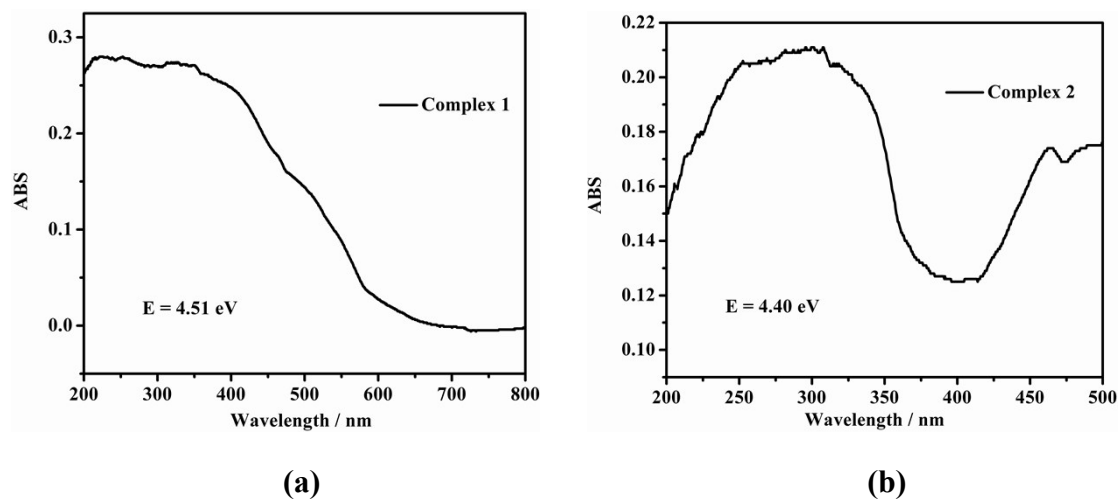

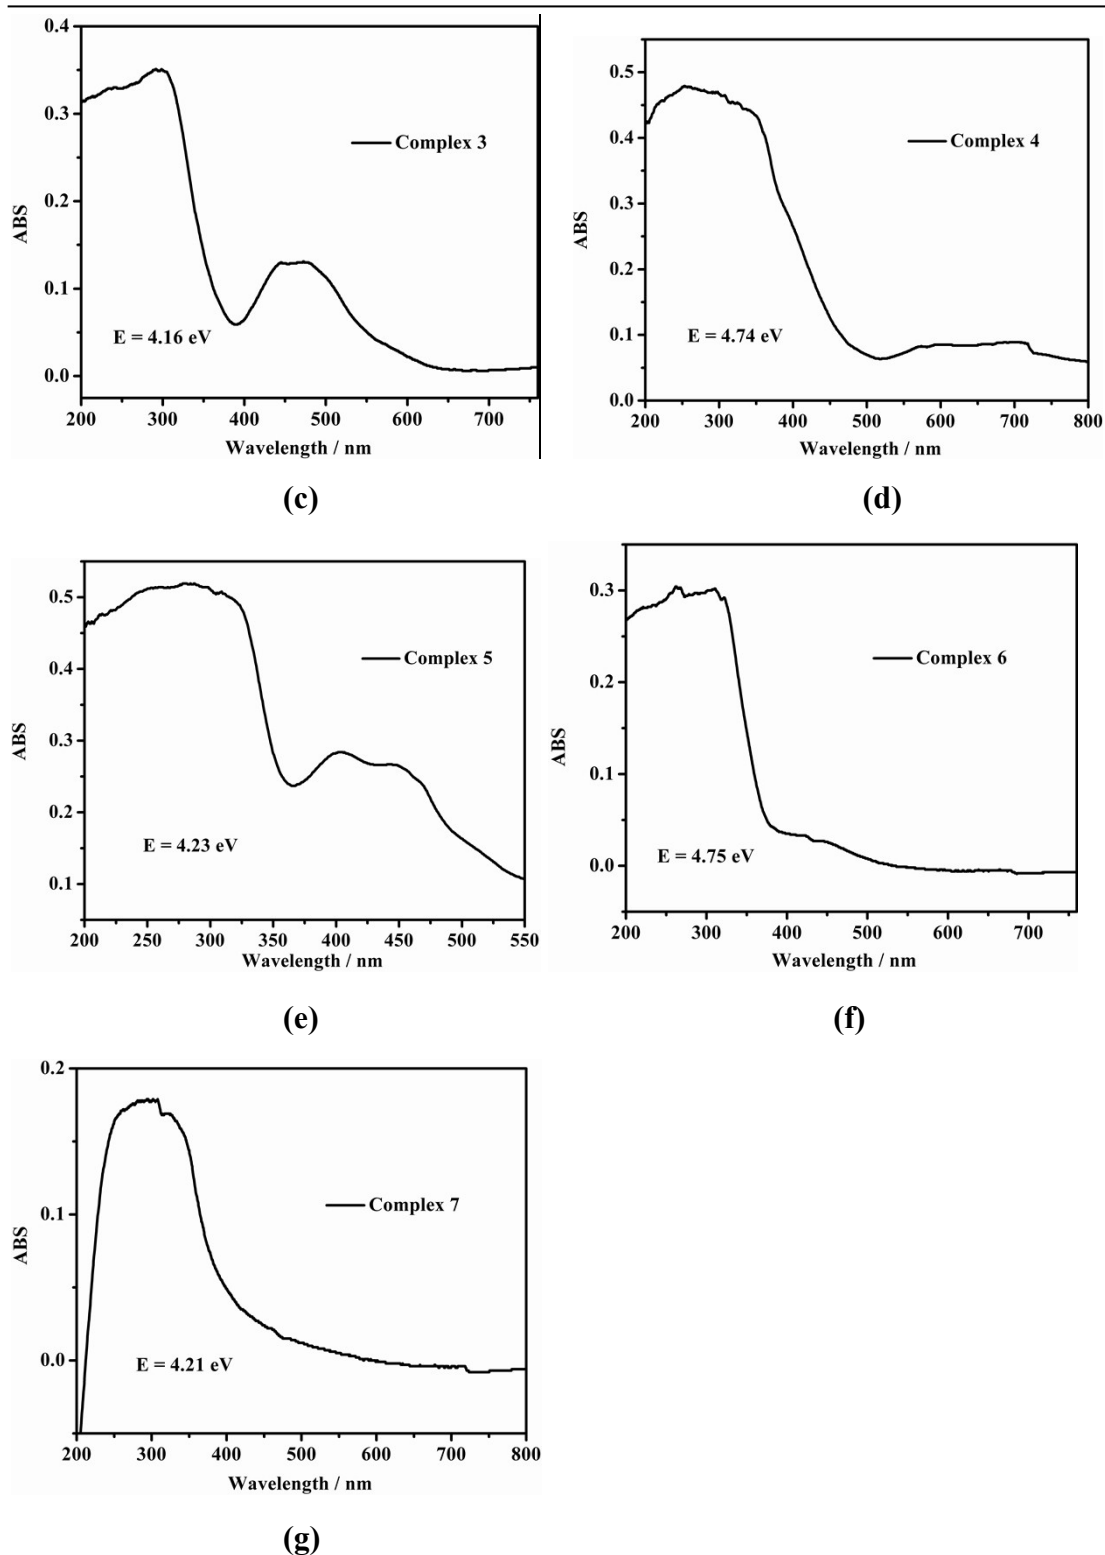

**Fig. S12.** The solid UV-vis spectra of the title complexes and the calculative bandgaps.

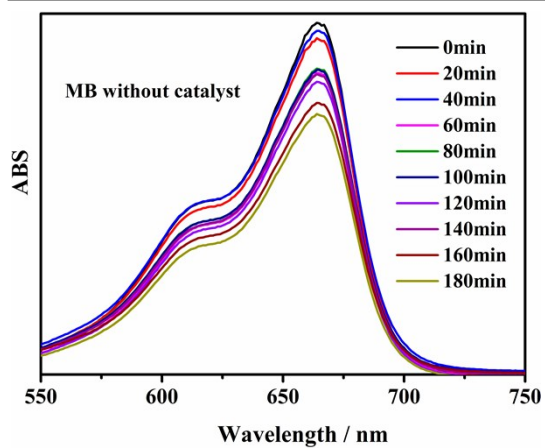

(a)

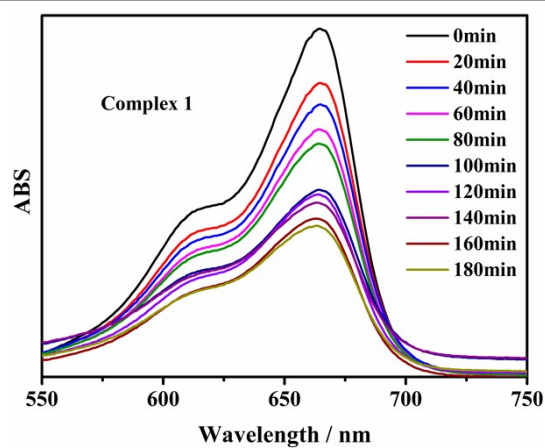

(b)

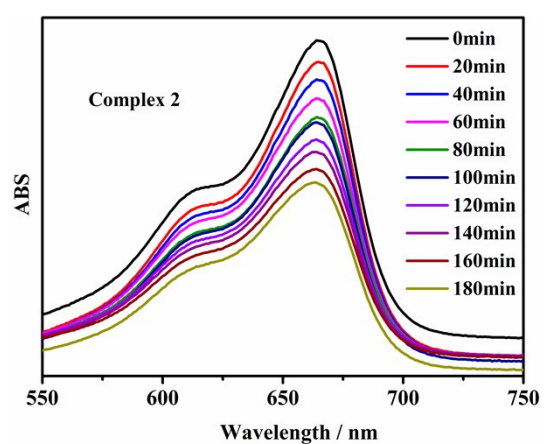

(c)

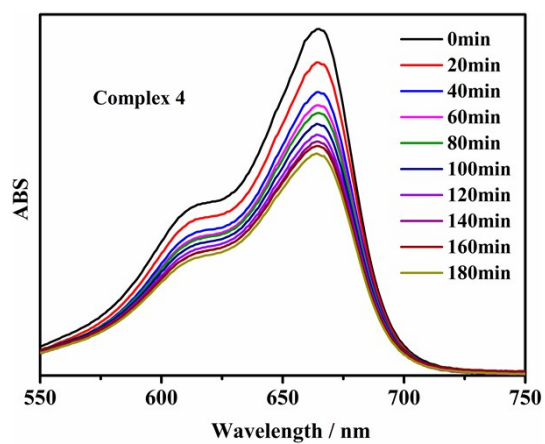

(d)

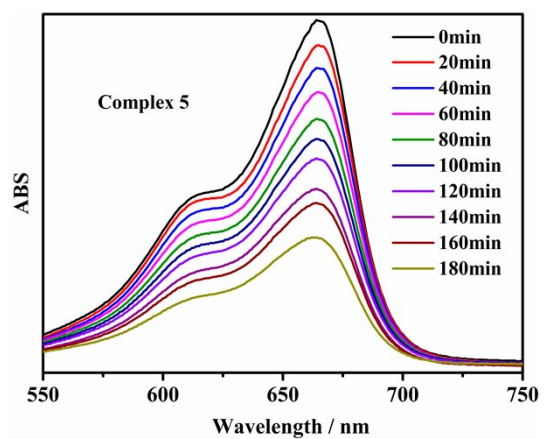

(e)

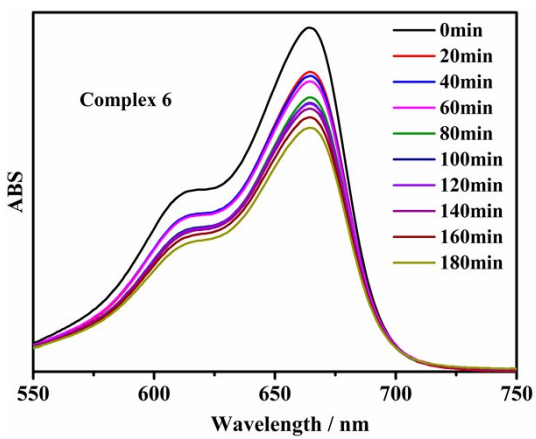

(f)

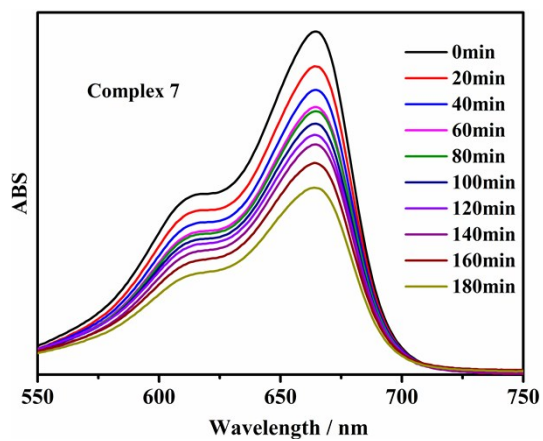

(g)

**Fig. S13.** Absorption spectra of the MB solution during the decomposition reaction under the visible light irradiation with the presences of complexes 1–2, 4–7, and no crystal in the same conditions.
